# Supplementary material for: Surface phosphating activation of PtMo 6 -Ni-BDC nanosheets for an enhanced hydrogen evolution reaction
Source: Royal Society of Chemistry journal article supplement (doi:10.1039/d5nr04575d), 2026-01-01
Supplement: d5nr04575d1.pdf [file d5nr04575d1.pdf]

## Supplementary Information

### Surface Phosphating Activation of PtMo<sub>6</sub>-Ni-BDC Nanosheets for Enhanced Hydrogen Evolution Reaction

Bo-Cong Shi,<sup>a</sup> Man Jin,<sup>a</sup> Jun-Rui Chen,<sup>b</sup> Pengfei Wu,<sup>c</sup> Dongsheng Geng<sup>a</sup> and Yu-Jia Tang<sup>\*a</sup>

<sup>a</sup> School of Chemistry and Materials Science, Nanjing University of Information Science and Technology, Nanjing, 210044, China.

E-mail: tangyujia@nuist.edu.cn

<sup>b</sup> Reading academy, Nanjing University of Information Science and Technology, 219 Ningliu Road, Nanjing, 210044, China

<sup>c</sup> National Key Laboratory for Development and Utilization of Forest Food Resources, Co-Innovation Center for Sustainable Forestry in Southern China, Nanjing Forestry University, Nanjing 210037, China.

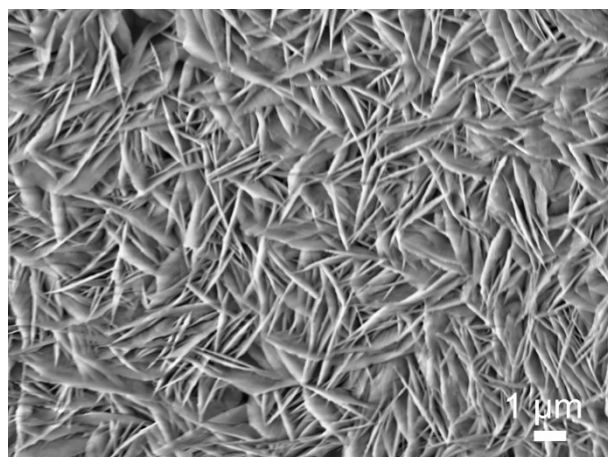

**Figure S1.** SEM image of Ni-BDC nanosheets grown on NF.

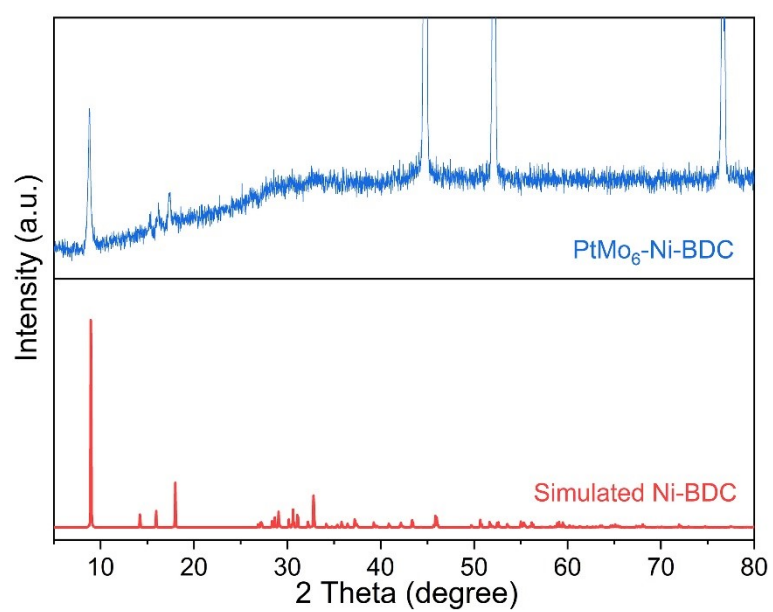

**Figure S2.** XRD spectra of PtMo<sub>6</sub>-Ni-BDC on NF and simulated Ni-BDC.

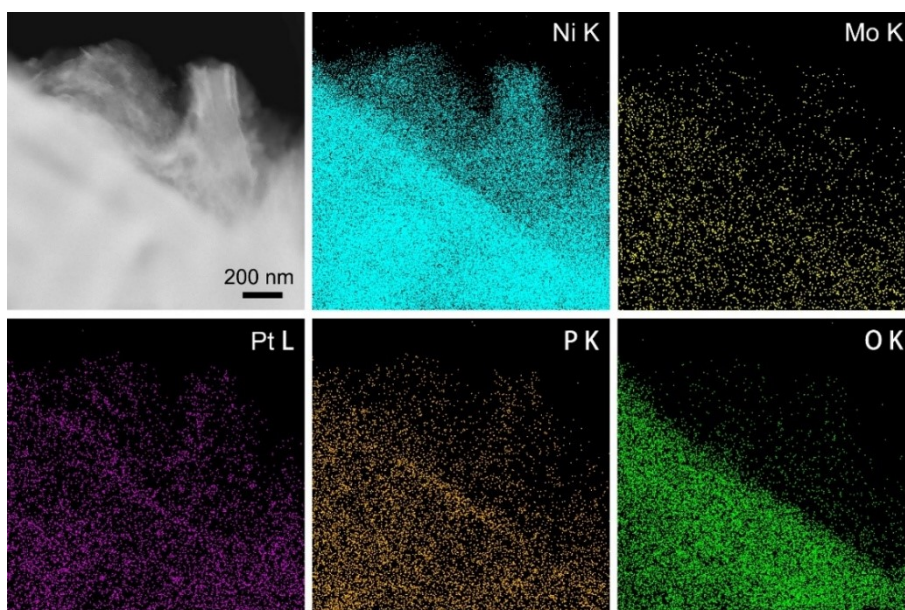

**Figure S3.** Mapping images of corresponding elements of Ni, Mo, Pt, P, and O of P-PtMo<sub>6</sub>-Ni-BDC ultrasonicated from NF.

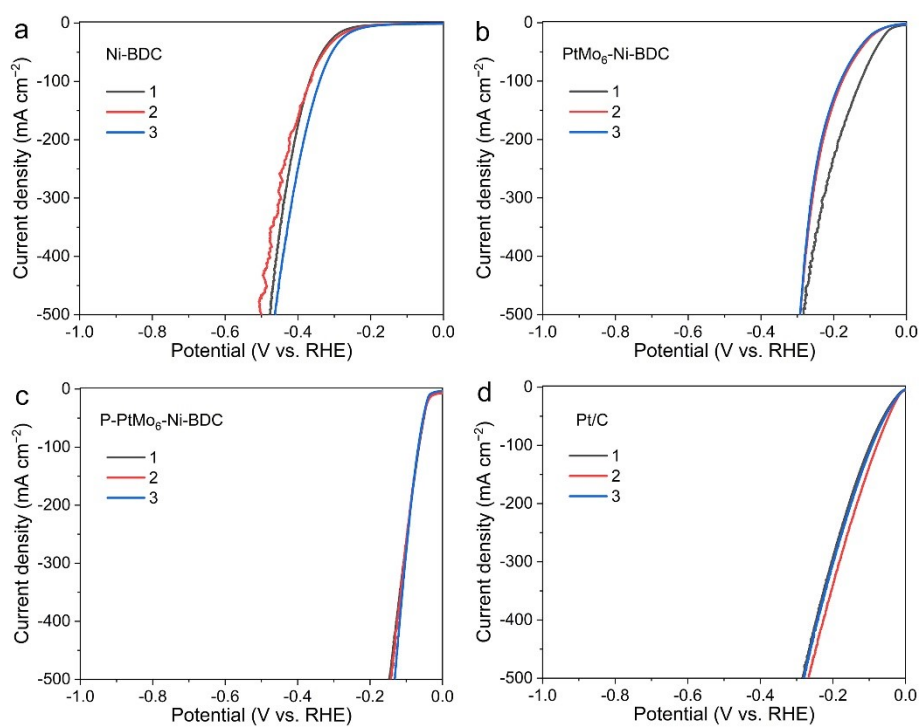

**Figure S4.** LSV curves of Ni-BDC, PtMo<sub>6</sub>-Ni-BDC, P-PtMo<sub>6</sub>-Ni-BDC, and Pt/C on NF measured three times for HER in 1.0 M KOH.

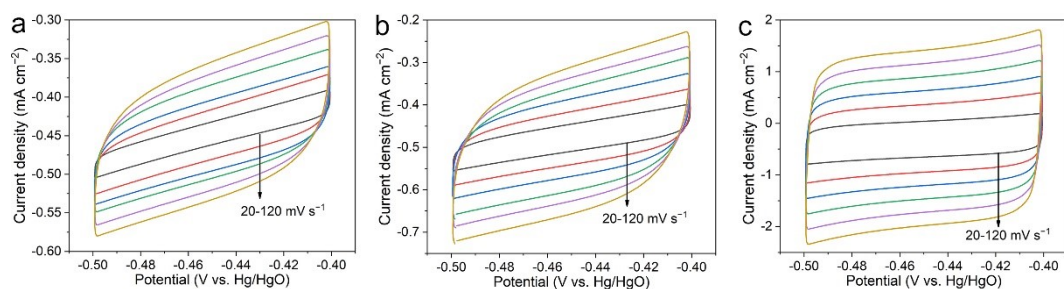

**Figure S5.** CV curves measured in a non-faradic region of  $-0.5$  to  $-0.4$  V vs. Hg/HgO at different scan rates (20, 40, 60, 80, 100, and  $120 \text{ mV s}^{-1}$ ) in  $1.0 \text{ M KOH}$ . (a) Ni-BDC, (b) PtMo<sub>6</sub>-Ni-BDC, and (c) P-PtMo<sub>6</sub>-Ni-BDC.

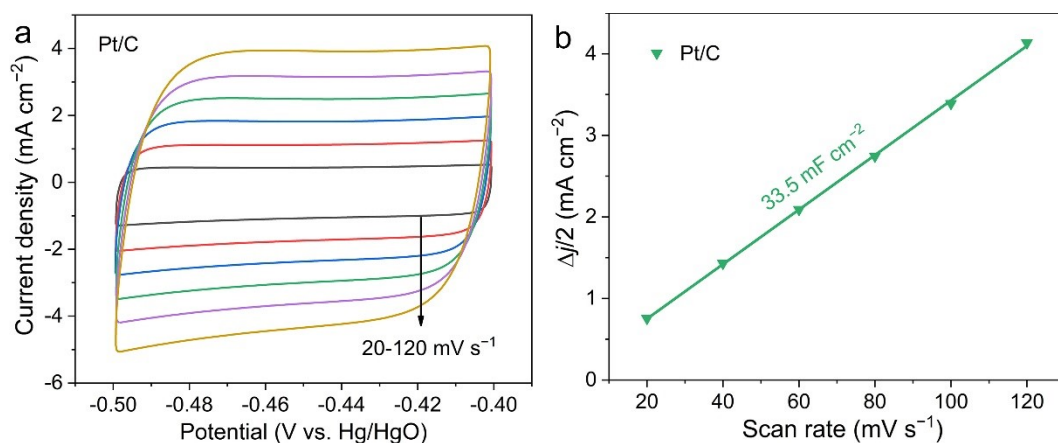

**Figure S6.** (a) CV curves of Pt/C measured in a non-faradic region of  $-0.5$  to  $-0.4$  V vs. Hg/HgO at different scan rates (20 -  $120 \text{ mV s}^{-1}$ ) in  $1.0 \text{ M KOH}$ . (b)  $C_{dl}$  plot of Pt/C.

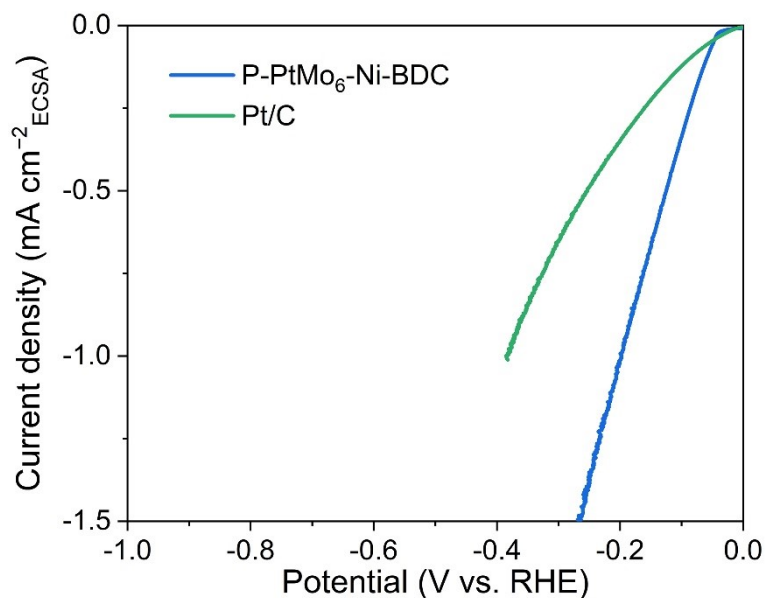

**Figure S7.** ECSA-normalized LSV curves of P-PtMo<sub>6</sub>-Ni-BDC and Pt/C for HER.

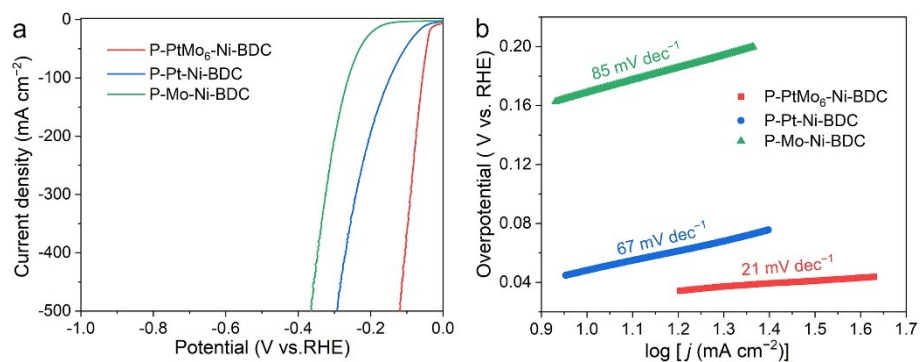

**Figure S8.** Electrochemical performance of P-PtMo<sub>6</sub>-Ni-BDC, P-Pt-Ni-BDC, and P-Mo-Ni-BDC prepared by soaking Ni-BDC/NF precursor in solutions of PtMo<sub>6</sub>, K<sub>2</sub>Pt(OH)<sub>6</sub>, and K<sub>2</sub>MoO<sub>4</sub>, respectively, for HER measured in 1.0 M KOH. (a) LSV curves and (b) Tafel plots.

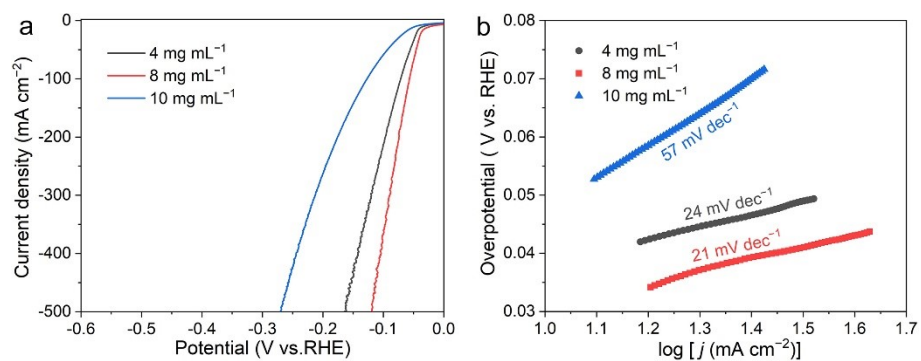

**Figure S9.** Electrochemical performance of P-PtMo<sub>6</sub>-Ni-BDC prepared by soaking Ni-BDC/NF precursor in different concentrations of PtMo<sub>6</sub> solution (4, 8, and, 10 mg mL<sup>-1</sup>) for HER measured in 1.0 M KOH. (a) LSV curves and (b) Tafel plots.

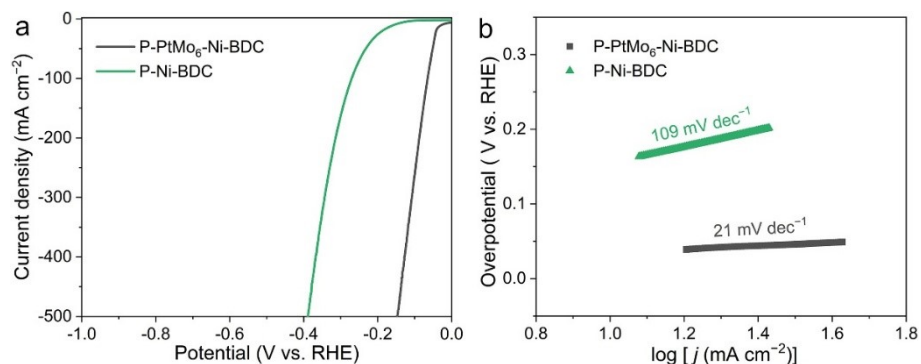

**Figure S10.** Electrochemical performance of P-PtMo<sub>6</sub>-Ni-BDC and P-Ni-BDC for HER in 1.0 M KOH. (a) LSV curves and (b) Tafel plots.

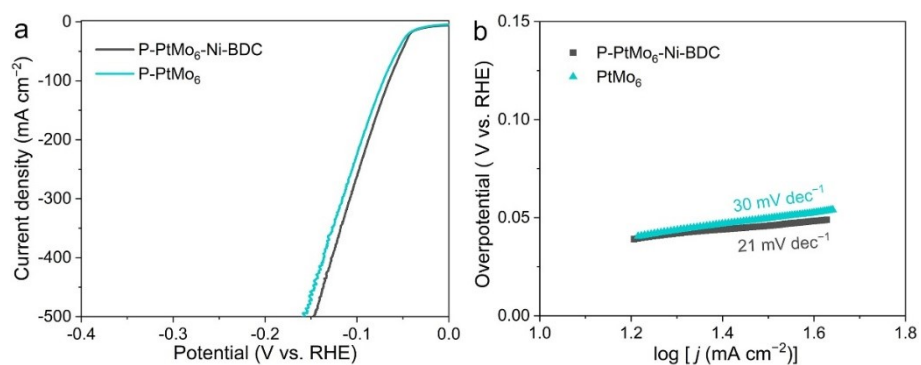

**Figure S11.** Electrochemical performance of P-PtMo<sub>6</sub> and P-PtMo<sub>6</sub>-Ni-BDC for HER in 1.0 M KOH. (a) LSV curves and (b) Tafel plots.

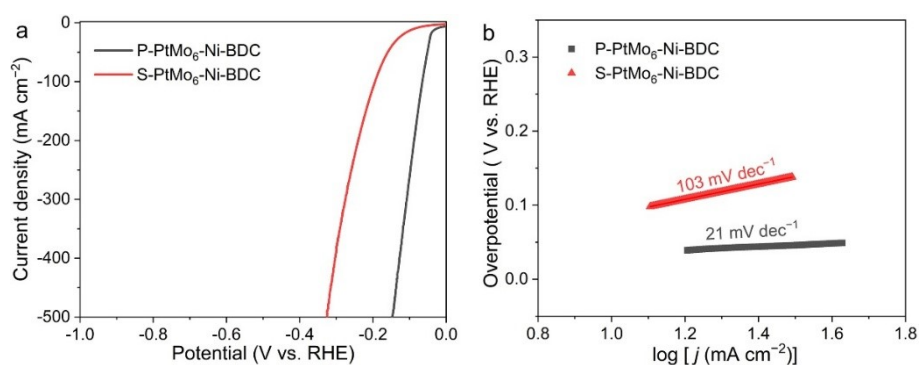

**Figure S12.** Electrochemical performance of P-PtMo<sub>6</sub>-Ni-BDC and S-PtMo<sub>6</sub>-Ni-BDC prepared via phosphidation and sulfidation treatments, respectively. (a) LSV curves and (b) Tafel plots.

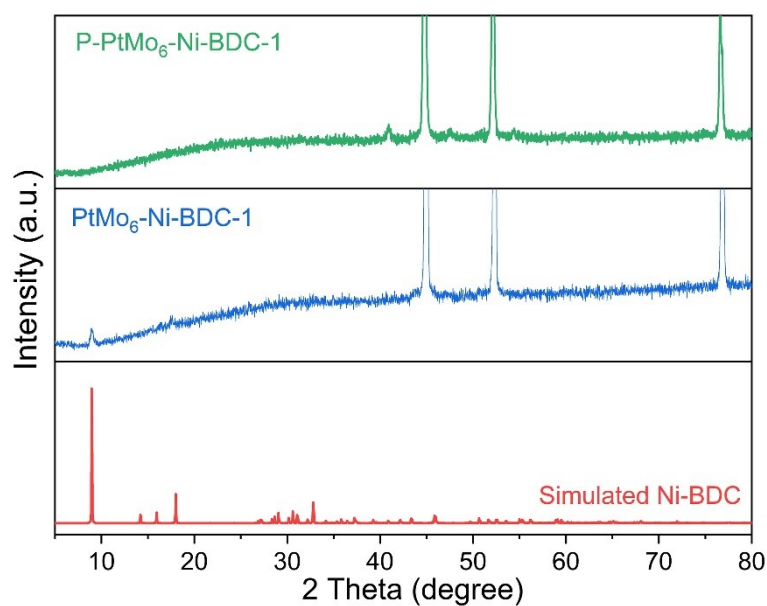

**Figure S13.** XRD pattern of PtMo<sub>6</sub>-Ni-BDC-1, P-PtMo<sub>6</sub>-Ni-BDC-1 on NF, and simulated Ni-BDC.

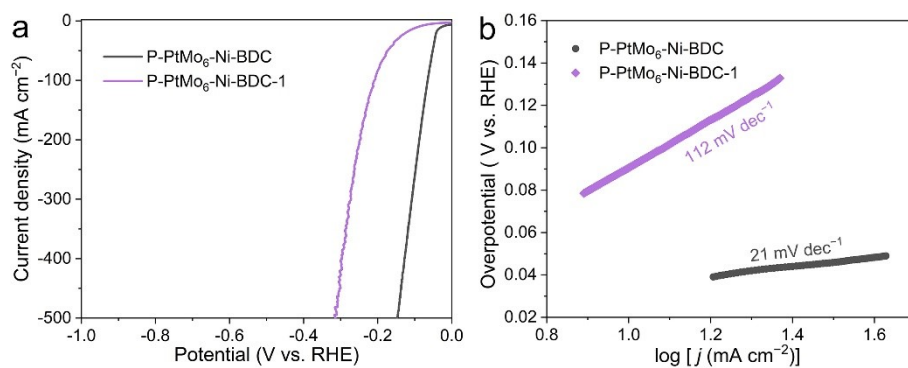

**Figure S14.** Electrochemical performance of P-PtMo<sub>6</sub>-Ni-BDC-1 and P-PtMo<sub>6</sub>-Ni-BDC for HER. (a) LSV curves and (b) Tafel plots.



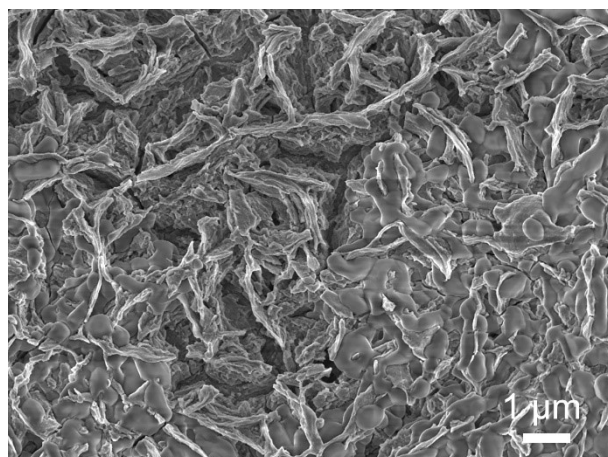

**Figure S15.** SEM image of P-PtMo<sub>6</sub>-Ni-BDC on NF after HER.

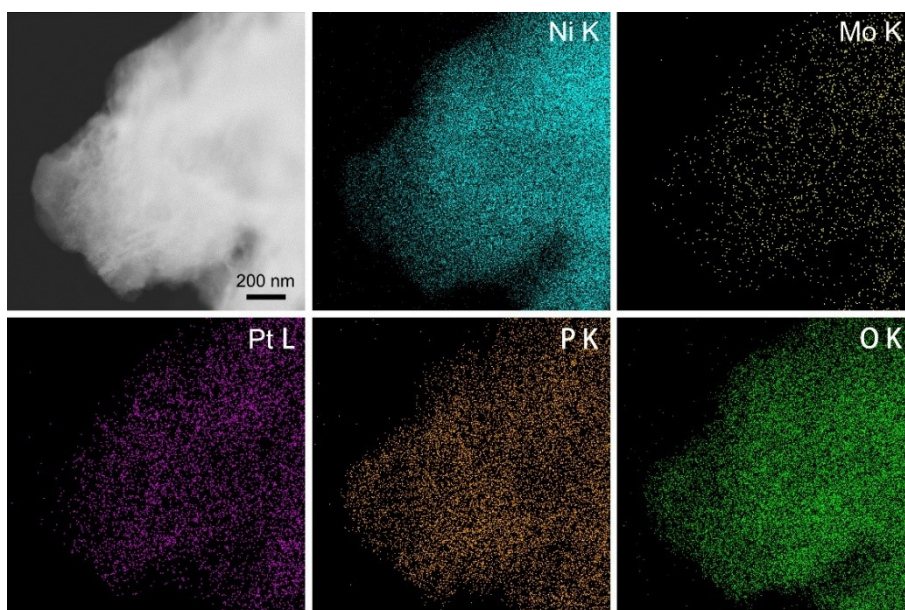

**Figure S16.** Mapping images of corresponding elements of Ni, Mo, Pt, P, and O of P-PtMo<sub>6</sub>-Ni-BDC ultrasonicated after HER.

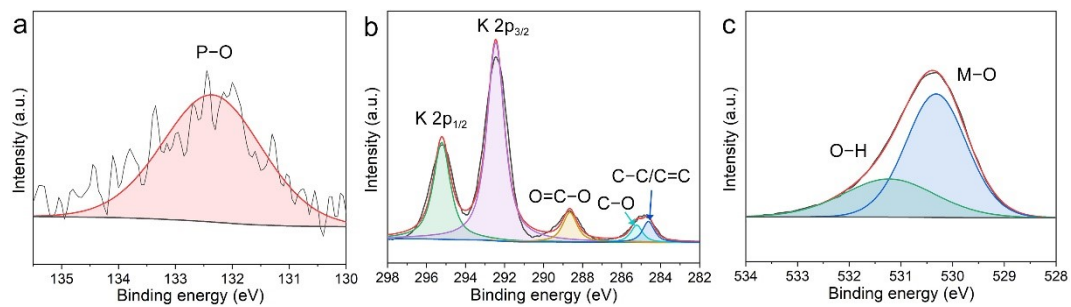

**Figure S17.** High-resolution XPS spectra of P-PtMo<sub>6</sub>-Ni-BDC on NF after HER. (a) P 2p, (b) C 1s, and (c) O 1s.

**Table S1.** Loading mass of P-PtMo<sub>6</sub>-Ni-BDC on NF. (The area of NF is 8 cm<sup>2</sup>)

|                                               | Sample 1                | Sample 2 | Sample 3 |
|-----------------------------------------------|-------------------------|----------|----------|
| Mass of NF (m)                                | 230 mg                  | 234 mg   | 231 mg   |
| Mass of P-PtMo <sub>6</sub> -Ni-BDC on NF (n) | 256 mg                  | 263 mg   | 259 mg   |
| Mass of P-PtMo <sub>6</sub> -Ni-BDC (n-m)     | 26 mg                   | 29 mg    | 28 mg    |
| Average loading mass                          | 3.5 mg cm <sup>-2</sup> |          |          |

**Table S2.** Comparison of HER performance of P-PtMo<sub>6</sub>-Ni-BDC and recently reported Mo- and Ni-based electrocatalysts in an alkaline medium.

| Electrocatalyst                                   | Overpotential at 10<br>mA cm <sup>-2</sup> (mV) | Tafel slope<br>(mV dec <sup>-1</sup> ) | Substrate      | Reference        |
|---------------------------------------------------|-------------------------------------------------|----------------------------------------|----------------|------------------|
| <b>P-PtMo<sub>6</sub>-Ni-BDC</b>                  | <b>26</b>                                       | <b>21</b>                              | <b>Ni foam</b> | <b>This work</b> |
| Co-Mo-0.125-6N                                    | 52                                              | 54                                     | Ni foam        | 1                |
| NiCoCu-Mo <sub>0.078</sub> /CF                    | 35                                              | 50.12                                  | Cu foam        | 2                |
| Co <sub>3</sub> O <sub>4</sub> -Mo <sub>2</sub> N | 100                                             | 162.4                                  | Ni foam        | 3                |
| Pt/Ni-Mo-N-O                                      | 40.6@100 mA cm <sup>-2</sup>                    | 49.3                                   | Ni foam        | 4                |
| FeP/Ni <sub>2</sub> P/CP                          | 46                                              | 50.5                                   | Carbon paper   | 5                |
| MoO <sub>2</sub> @Ni <sub>2</sub> P               | 57                                              | 61                                     | Carbon paper   | 6                |
| Ni <sub>2</sub> P/MoNiP <sub>2</sub> /MoP-10      | 20                                              | 30.6                                   | Ni foam        | 7                |
| Cu <sub>3</sub> P/Ni <sub>2</sub> P               | 88.1                                            | 94                                     | Copper foam    | 8                |
| Ni <sub>2</sub> P-Ni <sub>12</sub> P <sub>5</sub> | 76                                              | 68.0                                   | Ni foam        | 9                |
| PS-MoNi                                           | 30                                              | 37                                     | Ni foam        | 10               |

**Table S3.** Atomic percentages of corresponding elements of P-PtMo<sub>6</sub>-Ni-BDC on NF before and after HER according to EDX results.

|           | before HER | after HER |
|-----------|------------|-----------|
| Ni (at.%) | 19.59      | 61.46     |
| Mo (at.%) | 8.71       | 1.53      |
| Pt (at.%) | 1.30       | 0.79      |
| P (at.%)  | 10.54      | 0.82      |
| C (at.%)  | 30.91      | 11.92     |
| O (at.%)  | 38.95      | 21.35     |
| K (at.%)  | /          | 2.13      |

**Table S4.** Concentrations of corresponding elements of P-PtMo<sub>6</sub>-Ni-BDC ultrasonicated from the NF support before and after HER measured by ICP-MS.

|                          | Before HER | After HER |
|--------------------------|------------|-----------|
| Ni (mg L <sup>-1</sup> ) | 30.08      | 31.57     |
| Mo (mg L <sup>-1</sup> ) | 13.21      | 10.07     |
| Pt (mg L <sup>-1</sup> ) | 4.05       | 5.64      |
| P (mg L <sup>-1</sup> )  | 15.89      | 5.10      |

## References

- 1 X. Zhang, A. Wu, D. Wang, Y. Jiao, H. Yan, C. Jin, Y. Xie and C. Tian, *Appl. Catal. B- Environ.*, 2023, **328**, 122474.
- 2 G. Qian, Y. Wang, L. Li, M. Lu, C. Chen, D. Min, Z. Wei and P. Tsiakaras, *Adv. Funct. Mater.*, 2024, **34**, 2404055.
- 3 T. Wang, P. Wang, W. Zang, X. Li, D. Chen, Z. Kou, S. Mu and J. Wang, *Adv. Funct. Mater.*, 2022, **32**, 2107382.
- 4 W. Yu, Z. Chen, Y. Fu, W. Xiao, B. Dong, Y. Chai, Z. Wu and L. Wang, *Adv. Funct. Mater.*, 2023, **33**, 2210855.
- 5 M. Gao, P. Gao, T. Lei, C. Ouyang, X. Wu, A. Wu and Y. Du, *J. Mater. Chem. A*, 2022, **10**, 15569-15579.
- 6 Z. Zhang, X. Lin, S. Tang, H. Xie and Q. Huang, *J. Colloid Interf. Sci.*, 2023, **630**, 494-501.
- 7 X. Bu, D. Yin, D. Chen, Q. Quan, Z. Yang, S. Yip, C.-Y. Wong, X. Wang and J. C. Ho, *Small*, 2023, **19**, 2304546.
- 8 H. Liu, J. Gao, X. Xu, Q. Jia, L. Yang, S. Wang and D. Cao, *Chem. Engin. J.*, 2022, **448**,

137706.

9 Z. Wang, S. Wang, L. Ma, Y. Guo, J. Sun, N. Zhang and R. Jiang, *Small*, 2021, **17**, 2006770.

10 J. Song, Y. Q. Jin, L. Zhang, P. Dong, J. Li, F. Xie, H. Zhang, J. Chen, Y. Jin, H. Meng and X. Sun, *Adv. Energy Mater.*, 2021, **11**, 2003511.
